# Supplementary material
Source: MDPI journal article supplement (https://www.mdpi.com/2624-7402/6/2/75)
Supplement: s1 [file s1]

Archive with 1 entries (1 files):
- agriengineering-2849329-supplementary.pdf
